# Supplementary material for: Copolymer-Green-Synthesized Copper Oxide Nanoparticles Enhance Folate-Targeting in Cervical Cancer Cells In Vitro
Source: MDPI journal article supplement (doi:10.3390/polym15102393), 2023-05-20
Supplement: s1 [file s1]

Supplementary

## Copolymer-Green-synthesized Copper Oxide Nanoparticles enhance folate-targeting in cervical cancer cells in vitro

Keelan Jagaran <sup>1</sup> and Moganavelli Singh <sup>1,\*</sup>

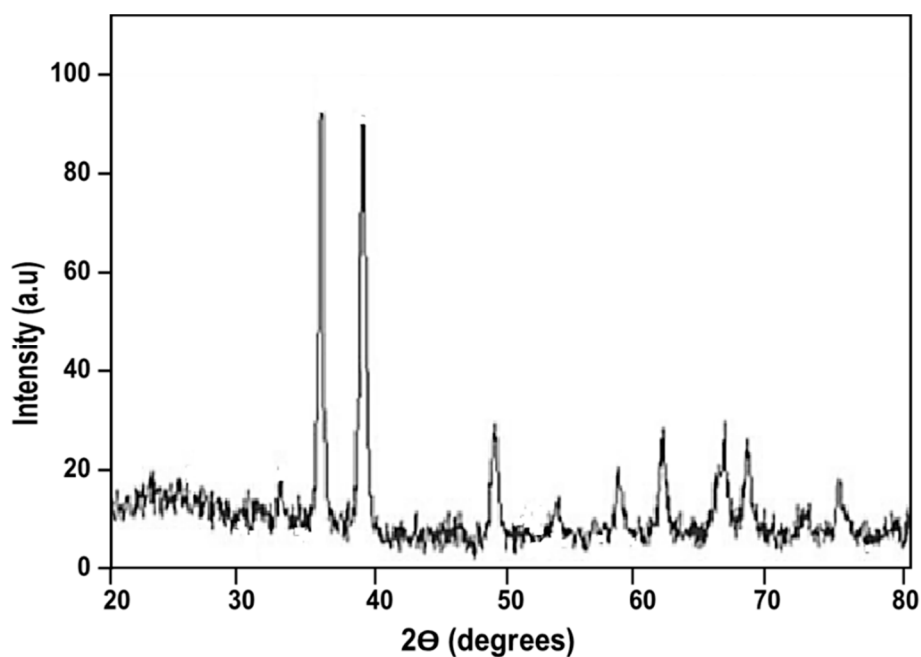

Supplementary Figure S1: XRD of copper oxide nanoparticles.
